# Supplementary material for: Electron transfer in the respiratory chain at low salinity
Source: Springer Nature journal article supplement (doi:10.1038/s41467-024-52475-3), 2024-09-19
Supplement: MOESM1 [file 41467_2024_52475_MOESM1_ESM.pdf]

## Supporting information

### Electron transfer in the respiratory chain at low salinity

Ana Paula Lobez<sup>1,a</sup>, Fei Wu<sup>1,a</sup>, Justin Di Trani<sup>b</sup>, John L. Rubinstein<sup>b,c,d</sup>, Mikael Oliveberg<sup>2,a</sup>,  
Peter Brzezinski<sup>2,a</sup> and Agnes Moe<sup>2,a,e</sup>

<sup>a</sup> Department of Biochemistry and Biophysics, The Arrhenius Laboratories for Natural Sciences, Stockholm University, SE-106 91 Stockholm, Sweden.

<sup>b</sup> Molecular Medicine program, The Hospital for Sick Children, 686 Bay Street, Toronto, Ontario, Canada M5G 0A4

<sup>c</sup> Department of Medical Biophysics, The University of Toronto, 101 College Street, Toronto, Ontario, Canada M5G 1L7

<sup>d</sup> Department of Biochemistry, The University of Toronto, 1 Kings College Circle, Toronto, Ontario, Canada M5S 1A8

<sup>e</sup> Present address: Institute of Biochemistry and Molecular Medicine, University of Bern, Bühlstrasse 28, 3012 Bern.

<sup>1</sup> A.P.L. and F.W. contributed equally to this work.

<sup>2</sup>Correspondence: Mikael Oliveberg, [mikael@dbb.su.se](mailto:mikael@dbb.su.se); Agnes Moe, [agnes.moe@dbb.su.se](mailto:agnes.moe@dbb.su.se) ([agnes.moe@unibe.ch](mailto:agnes.moe@unibe.ch)); Peter Brzezinski, [peterb@dbb.su.se](mailto:peterb@dbb.su.se)

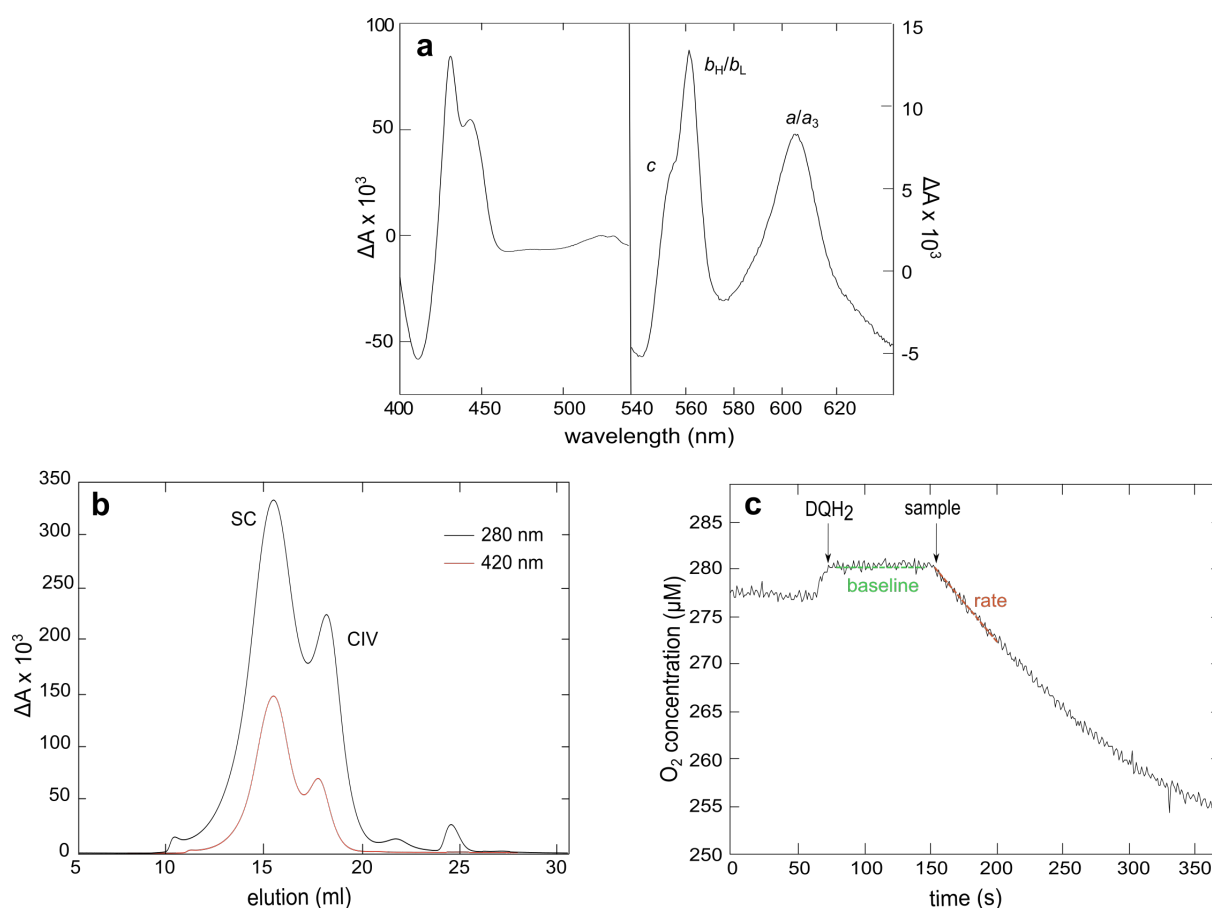

**Supplementary Figure S1. Purification and activity of the *S. cerevisiae* supercomplex. (a)**

Reduced-minus-oxidized difference spectrum of the purified supercomplex after size exclusion chromatography in 20 mM KCl, 20 mM  $KH_2PO_4$ -KOH (pH 7.4), 0.01 % GDN. The difference absorption coefficients used to calculate the concentration were the following:  $\epsilon_{554}=21 \text{ mM}^{-1} \text{ cm}^{-1}$  (cyt. c and  $c_1$ )  $\epsilon_{562}=51.2 \text{ mM}^{-1} \text{ cm}^{-1}$  (hemes b) and  $\epsilon_{603}=25 \text{ mM}^{-1} \text{ cm}^{-1}$  (heme a) <sup>1,2</sup>. (b) Size-exclusion chromatography elution profile obtained with a Superose 6 Increase 10/300 GL column in 150 mM KCl, 20 mM  $KH_2PO_4$ -KOH (pH 7.4), 0.01 % GDN. Elution was followed at 280 nm (total protein) and at 420 nm (hemes). Reduced-minus oxidized difference spectra of the fractions showed the presence of supercomplex (SC) in the eluted first peak and free CIV in the second peak. (c) Quinol oxidation- $O_2$  reduction rate over time of the *S. cerevisiae* CIII-CIV supercomplex. The turnover rate was calculated from the difference of the slopes after (rate) and before (baseline) addition of the supercomplex.

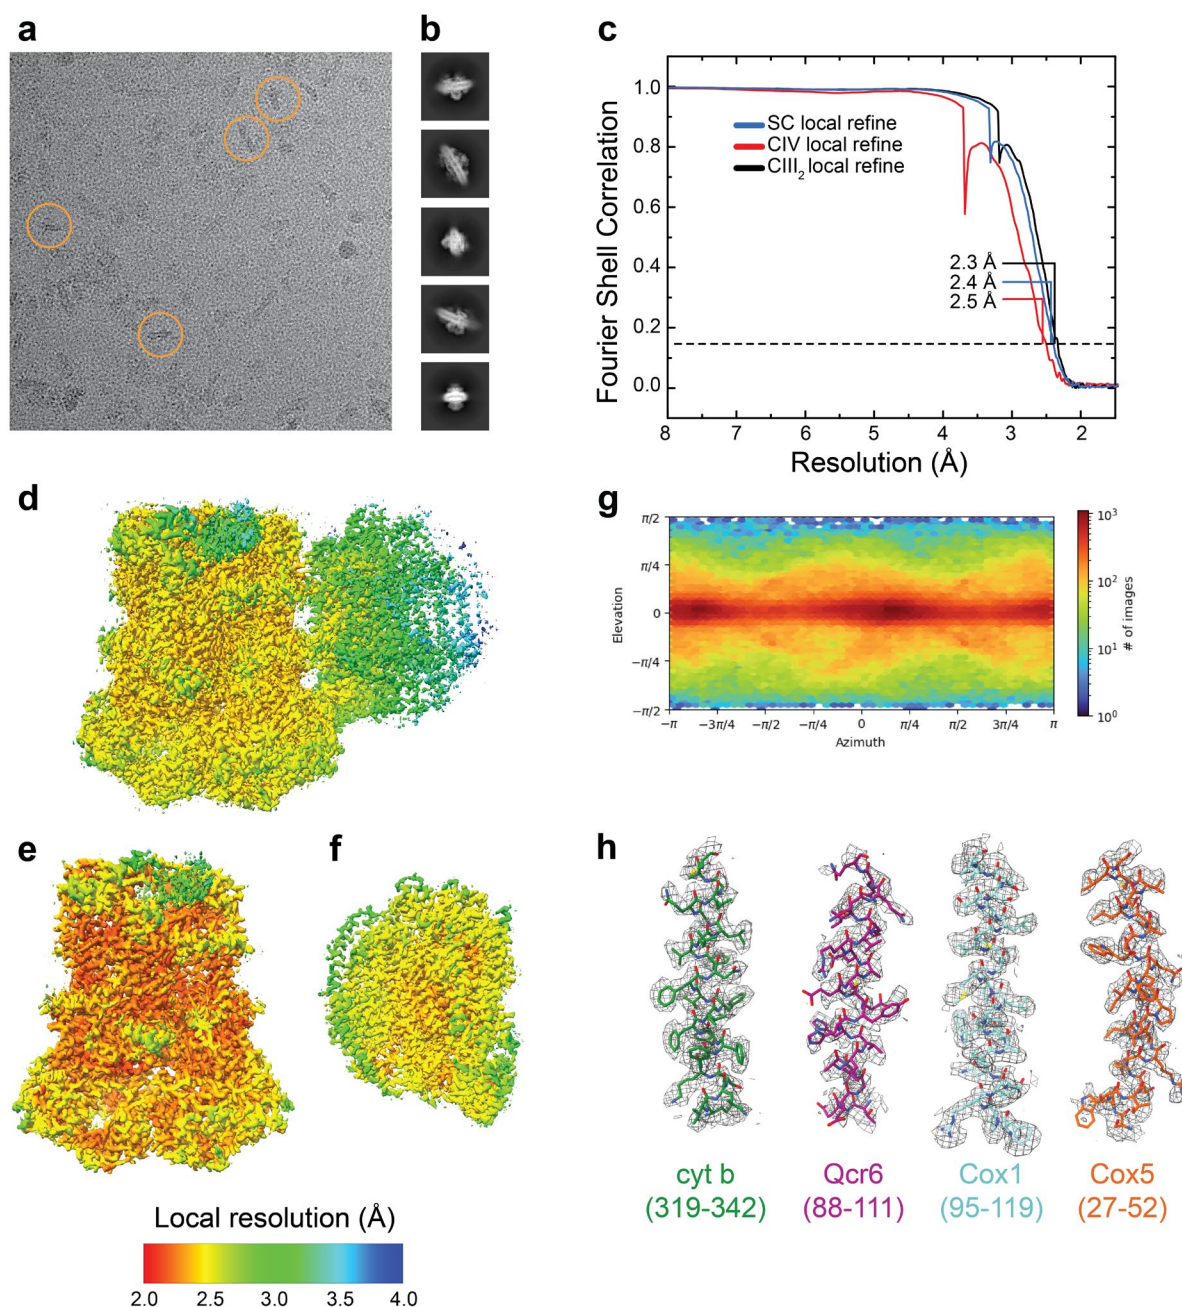

**Supplementary Figure S2. Cryo-EM validation.** (a) Example micrograph. (b) 2D class averages. (c) Fourier shell correlation (FSC) curves after refinement, corrected for the effects of masking. (d) Local resolution of the CIII<sub>2</sub>CIV<sub>1</sub> map. (e) CIII<sub>2</sub> local refinement. (f) CIV local refinement. (g) Viewing direction distribution for particle images. (h) Examples of model in map fit.

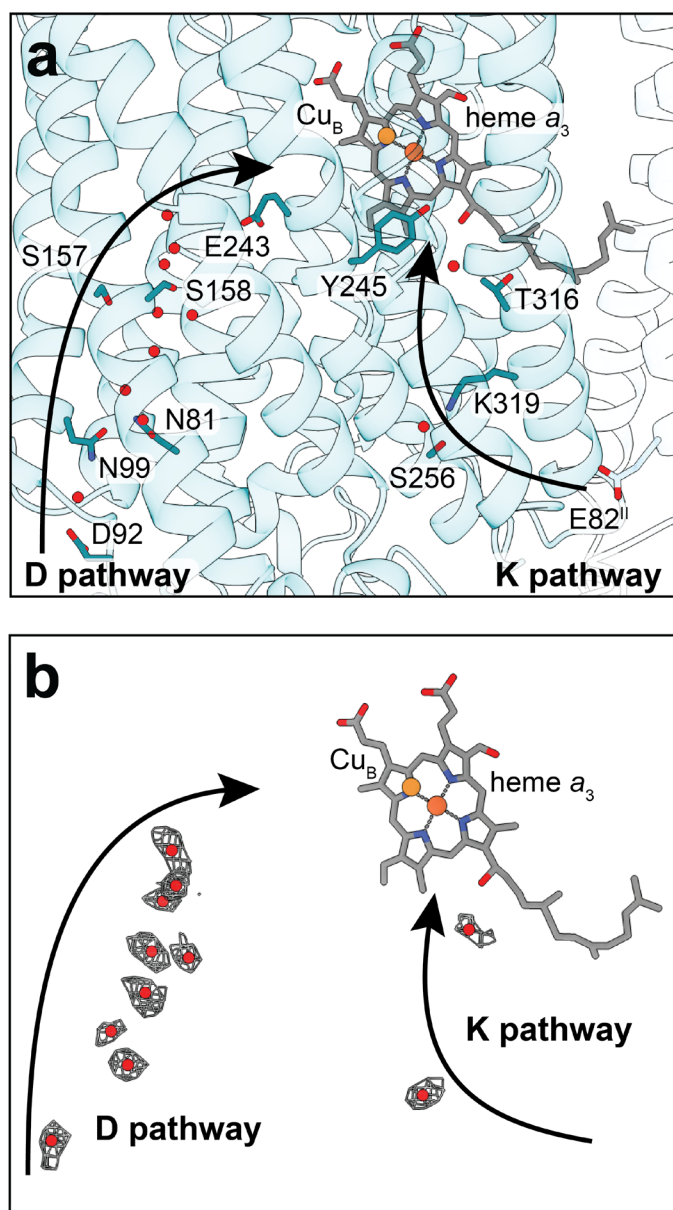

**Supplementary Figure S3. Proton pathways.** (a) Water molecules (red spheres) were resolved in the D and K proton pathways of CIV. The active site and residues of the D and K pathway are indicated. (b) Densities of resolved water molecules.



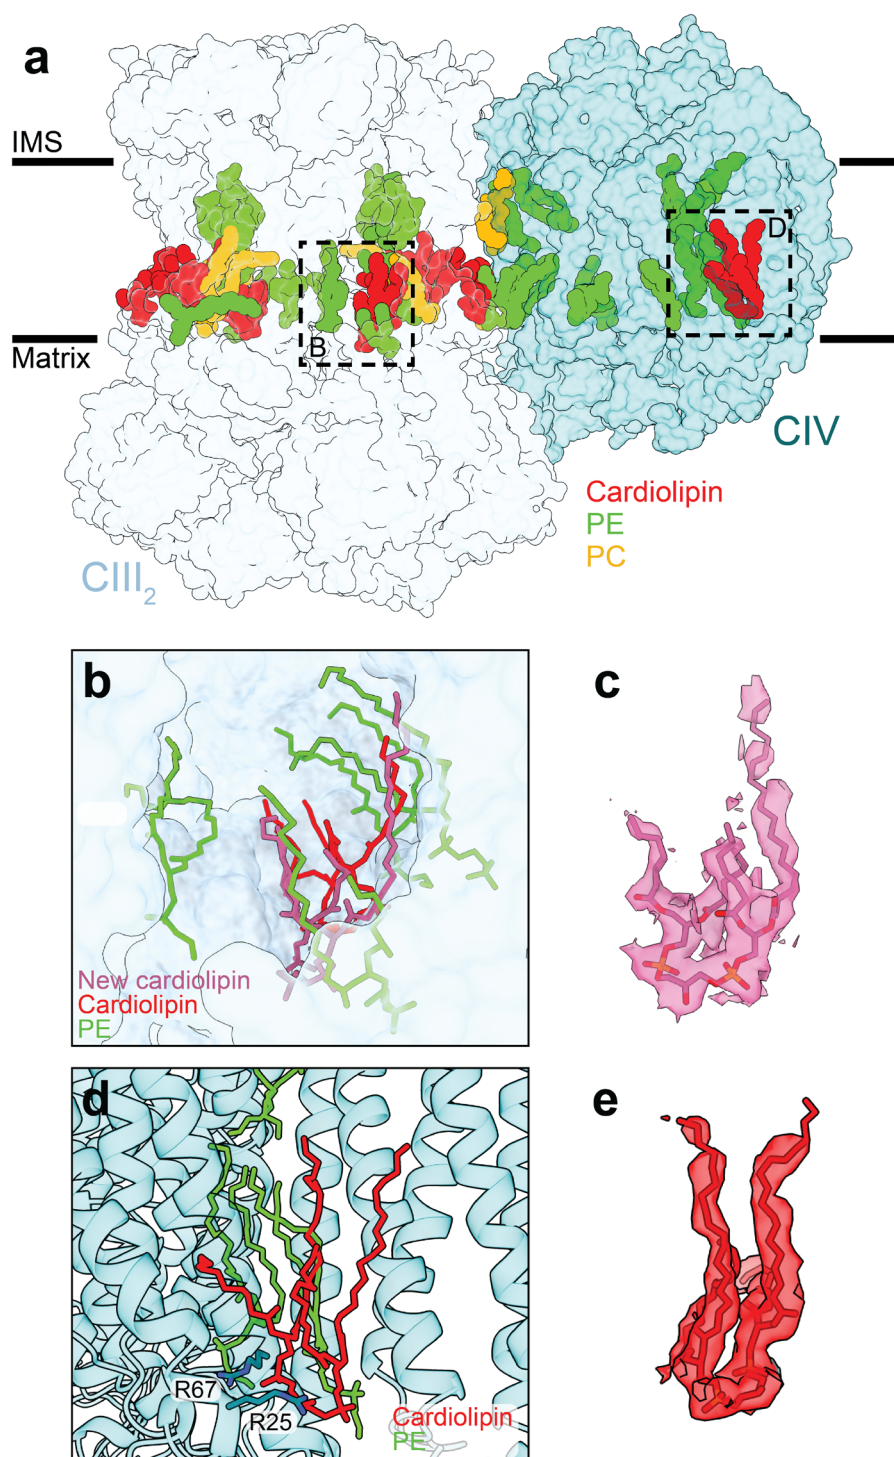

**Supplementary Figure S4. Lipids.** (a) Overview of lipids modelled in the CIII<sub>2</sub>CIV<sub>1</sub> supercomplex. (b) Cardiolipin in a CIII<sub>2</sub> cavity, previously modelled as two PE molecules in *S. cerevisiae*. (c) Density for the cardiolipin in (b) showing the glycerol backbone connecting the two phosphatidic acid moieties. (d) Cardiolipin outside the cavity in CIV, defined by a V-shaped cleft in Cox3, suggested to be used for O<sub>2</sub> diffusion to the CIV catalytic site. Arg67 (Cox3) and Arg25 (Cox7) located close to the cardiolipin molecule are indicated. (e) Density for the cardiolipin in (d) showing the glycerol backbone connecting the two phosphatidic acid moieties.

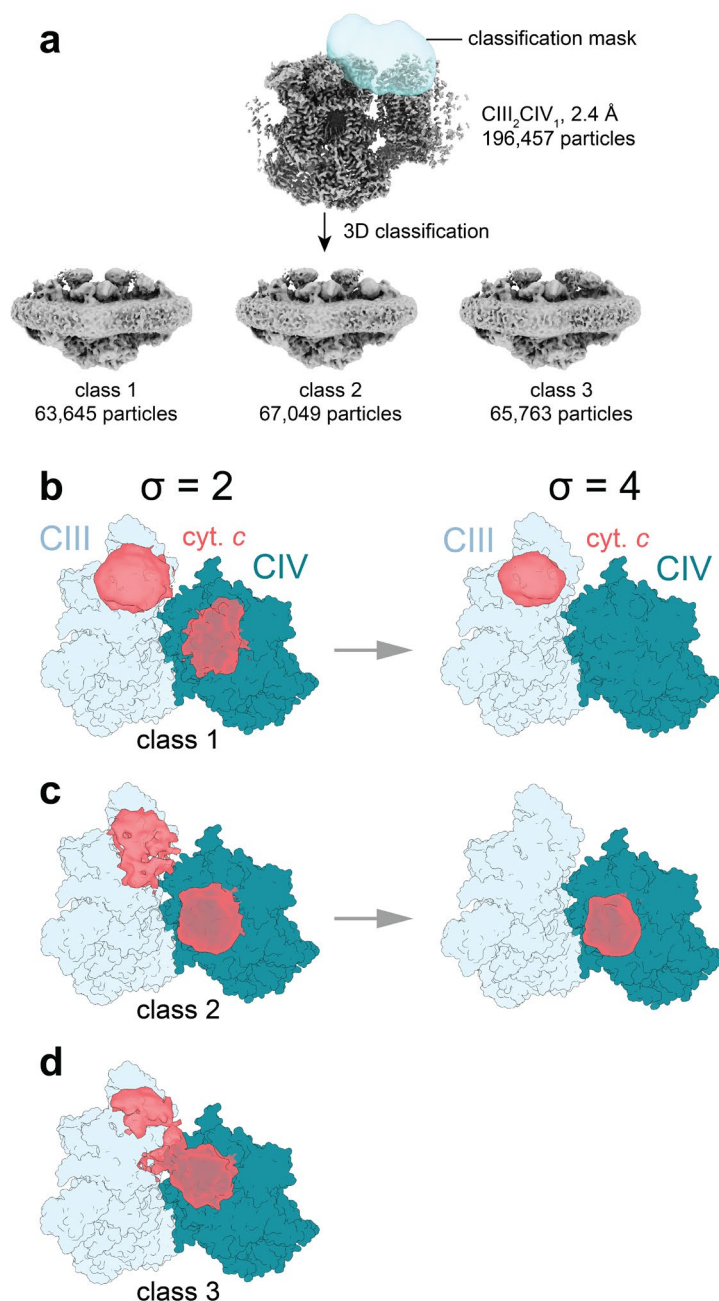

**Supplementary Figure S5. Cryo-EM 3D classification.** (a) CIII<sub>2</sub>CIV<sub>1</sub> supercomplex with the mask (light blue) and processing pipeline. Particle images could be divided into three classes. (b) Class 1 with cyt. c bound to a CIII monomer of CIII<sub>2</sub> (CIII in the figure) and CIV. The cyt. c molecule bound to a CIII monomer (in CIII<sub>2</sub>) is visible already at  $\sigma = 4$  while the second cyt. c molecule appears at  $\sigma = 2$ . (c) Class 2 with cyt. c bound to a CIII monomer of CIII<sub>2</sub> and CIV. The cyt. c molecule bound to CIV is visible already at  $\sigma = 4$  while the second cyt. c molecule appears at  $\sigma = 2$ . (d) Class 3 with a diffuse cyt. c density in between a CIII monomer of CIII<sub>2</sub> and an adjacent CIV, partly overlapping with CIII and CIV.

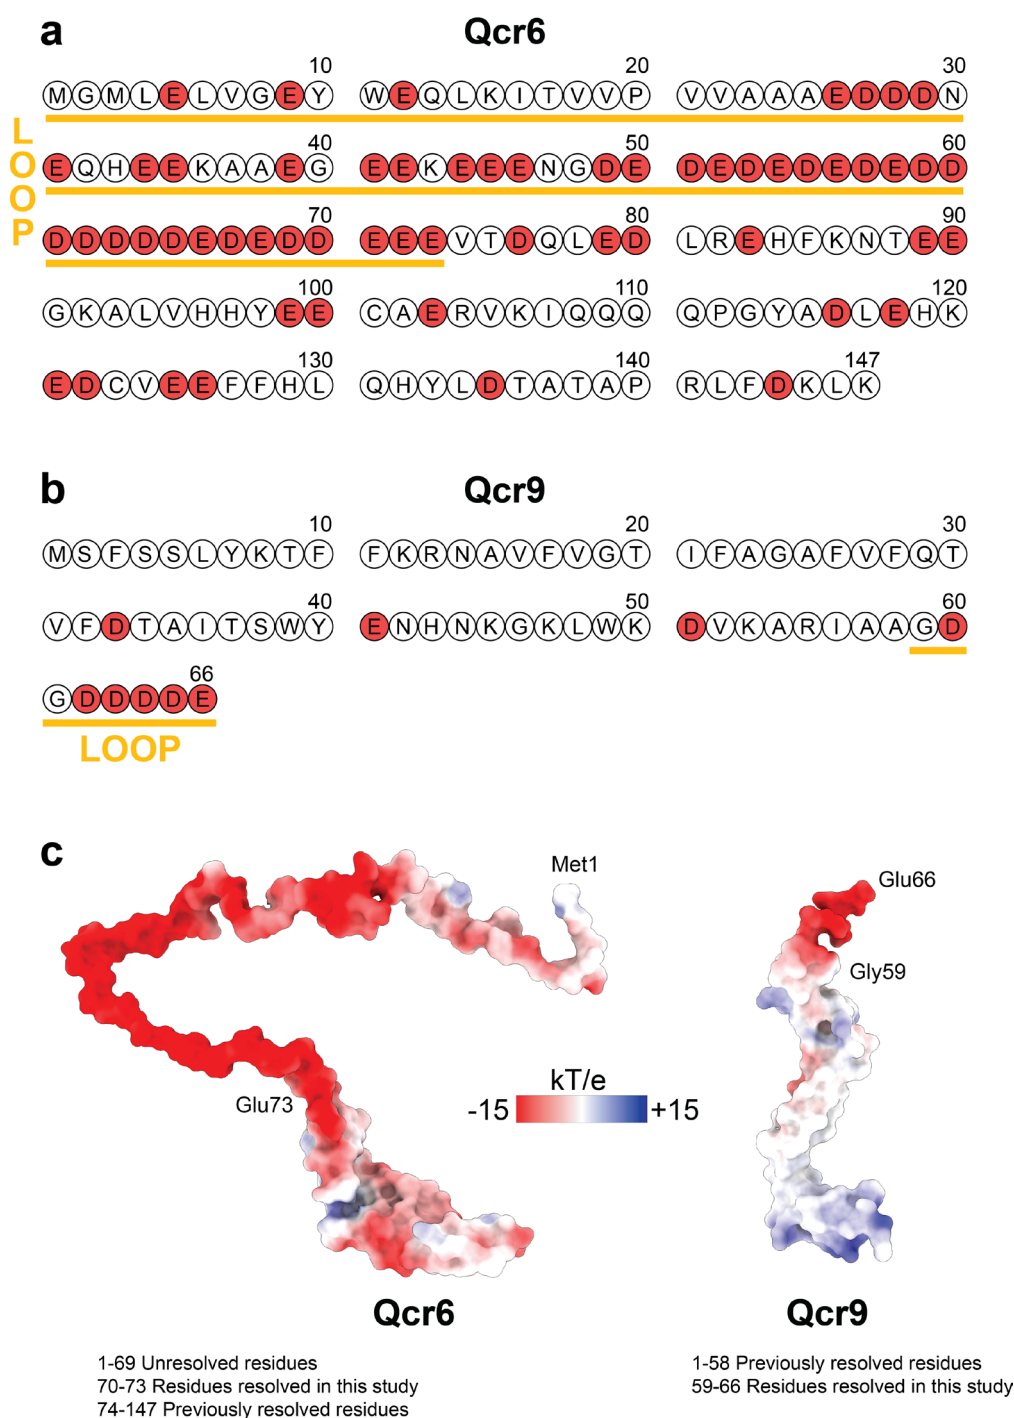

**Supplementary Figure S6. Sequence and electrostatic potential of Qcr6 and Qcr9.** (a) Sequence of Qcr6 from *S. cerevisiae* (Uniprot: P00127) with negatively charged residues indicated in red. The position of the unresolved loop (residues 1-73) is indicated in orange. (b) Sequence of Qcr9 from *S. cerevisiae* (Uniprot: P22289) with negatively charged residues indicated in red. The position of the unresolved loop (residues 59-66) is indicated in orange. (c) Coulomb electrostatic surface representation of Qcr6 and Qcr9. Predicted models from AlphaFold Protein Structure Database<sup>3</sup> were used to illustrate the two complete subunits.

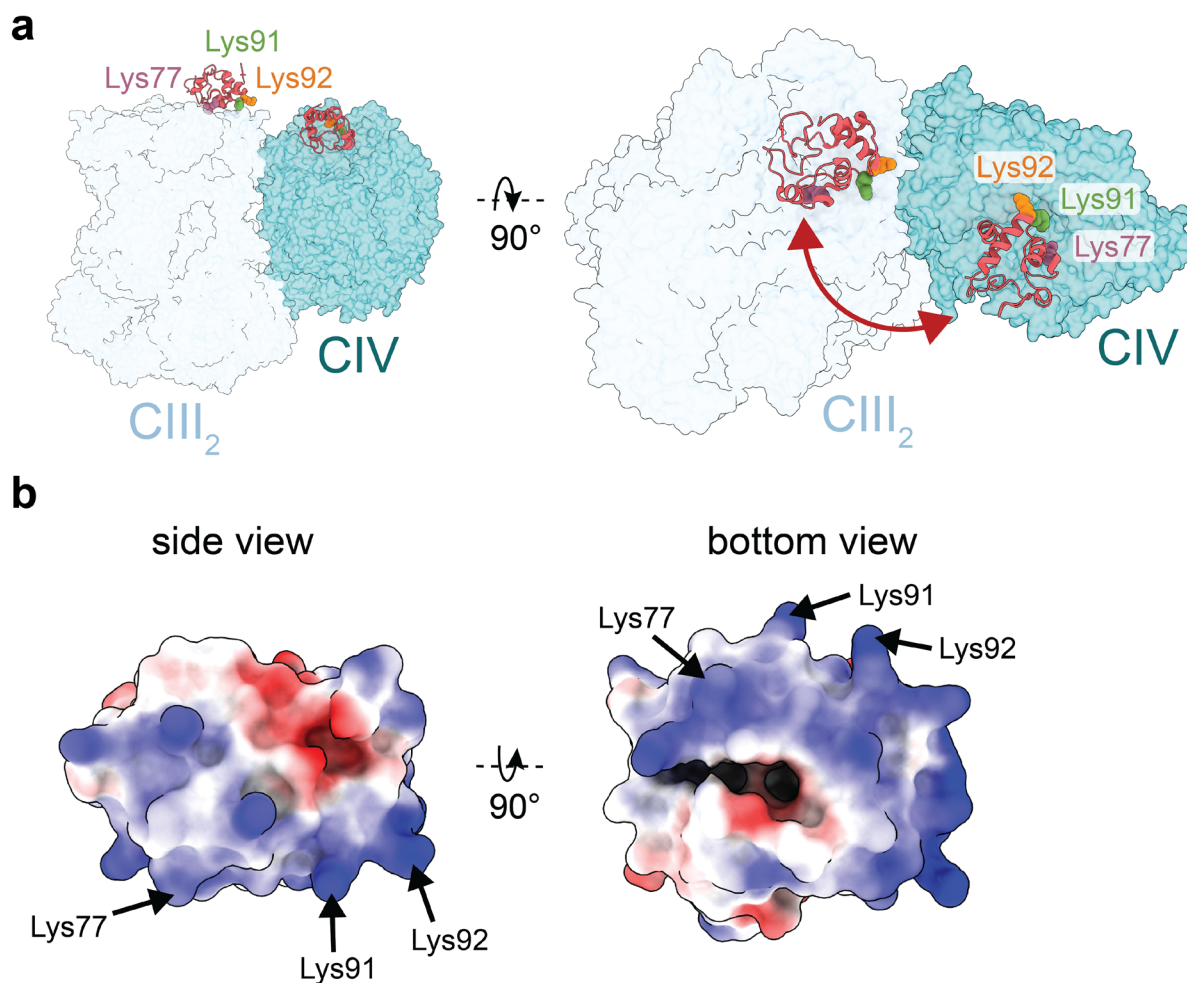

**Supplementary Figure S7. Cyt. *c* rotation and electrostatic surface.** (a) Cyt. *c* bound at CIII and CIV from the crystal structures of the CIII-cyt. *c*<sup>4</sup> (*S. cerevisiae* cyt. *c* and cyt. *bc*<sub>1</sub>) and CIV-cyt. *c*<sup>5</sup> (modelled for *S. cerevisiae* cyt. *c* and CIV, based on the crystal structure of the mammalian counterparts) co-complexes, respectively. Residues Lys77, Lys91 and Lys92 (*S. cerevisiae* cyt. *c* amino-acid residue numbering) are equivalent to Lys72, Lys86 and Lys87 (horse heart cyt. *c* amino-acid residue numbering), previously shown to be involved in binding (but not mediating electron transfer) of cyt. *c* to the bovine CytcO<sup>6</sup>. (b) Coulomb electrostatic potential surface for *S. cerevisiae* cyt. *c* with the three Lys residues involved in cyt. *c* binding to CIV (and presumably also CIII, <sup>4,7</sup>).



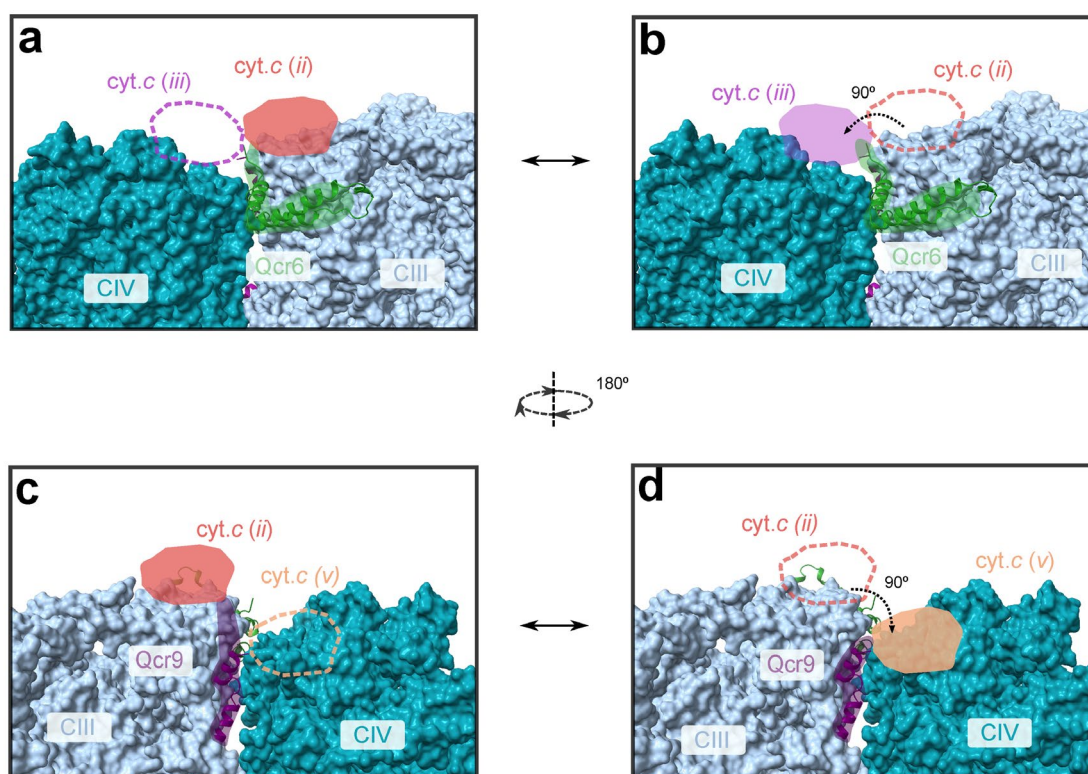

**Supplementary Figure S8. Schematic illustration of cyt. c interactions with Qcr6/9 while bound at CIII<sub>2</sub>/CIV.** (a) Cyt. c bound at a CIII monomer of CIII<sub>2</sub> with interacting Qcr6 (cyt. c position (ii), see **Figure Error! Bookmark not defined.**). Cyt. c at CIV (position (v), see **Figure Error! Bookmark not defined.**) is also shown (dashed). (b) Cyt. c bound at CIV (position (iii)) with interacting Qcr6, based on data from <sup>8</sup>. If Qcr6 would remain bound to cyt. c during transition from (ii) to (iii) cyt. c would rotate by ~90° as indicated by the arrow. The proposed rotation of cyt. c is based on a comparison of the crystal structures of the cyt. c-CIII<sub>2</sub> co-complex from *S. cerevisiae* <sup>4</sup> and the cyt. c-CIV co-complex from bovine heart mitochondria <sup>5</sup> (see **supplementary Figure S7**). (c, d) Cyt. c bound at a CIII monomer of CIII<sub>2</sub> (c) (position (ii)) or at CIV (position (v)) (d), interacting with Qcr9. Note the 180° rotation of the views in panels (a)/(b) and (c)/(d), respectively.

**Table S1. Cryo-EM data collection, refinement and validation statistics**

|                                                     |                                    |
|-----------------------------------------------------|------------------------------------|
| <b>Data collection and processing</b>               | CIII <sub>2</sub> CIV <sub>1</sub> |
| Magnification                                       | 105,000                            |
| Voltage (kV)                                        | 300                                |
| Electron exposure (e <sup>-</sup> /Å <sup>2</sup> ) | 40                                 |
| Defocus range (μm)                                  | 0.6 – 2.0                          |
| Pixel size (Å)                                      | 0.8464                             |
| Symmetry imposed                                    | None (C1)                          |
| Initial particle images (no.)                       | 2,252,229                          |
| Final particle images (no.)                         | 196,457                            |
| Map resolution (Å)                                  | 2.4                                |
| FSC threshold                                       | 0.143                              |
| Map resolution range (Å)                            | 2.3 – 8.9                          |
|                                                     |                                    |
| <b>Refinement</b>                                   |                                    |
| Initial model used (PDB code)                       | 6HU9                               |
| Model resolution (Å)                                | 2.7                                |
| FSC threshold                                       | 0.5                                |
| Map-sharpening <i>B</i> factor (Å <sup>2</sup> )    | 61.3                               |
| Model composition                                   |                                    |
| Nonhydrogen atoms                                   | 48,795                             |
| Protein residues                                    | 5,846                              |
| Ligands                                             | 60                                 |
| B factors (Å <sup>2</sup> )                         |                                    |
| Protein                                             | 62.19                              |
| Ligand                                              | 88.38                              |
| Root mean square deviations                         |                                    |
| Bond lengths (Å)                                    | 0.005                              |
| Bond angles (°)                                     | 0.614                              |
| Validation                                          |                                    |
| MolProbity score                                    | 1.71                               |
| Clashscore                                          | 4.62                               |
| Poor rotamers (%)                                   | 0.22                               |
| Ramachandran plot                                   |                                    |
| Favored (%)                                         | 96.87                              |
| Allowed (%)                                         | 3.13                               |
| Disallowed (%)                                      | 0.00                               |



## References

- 1 Van Gelder, B. F. & Slater, E. C. The extinction coefficient of cytochrome c. *BBA - Biochimica et Biophysica Acta* **58**, 593-595 (1962).
- 2 Vanneste, W. H. The stoichiometry and absorption spectra of components a and a-3 in cytochrome c oxidase. *Biochemistry* **5**, 838-848 (1966).
- 3 Varadi, M. *et al.* AlphaFold Protein Structure Database: massively expanding the structural coverage of protein-sequence space with high-accuracy models. *Nucleic Acids Research* **50**, D439-D444, (2021).
- 4 Lange, C. & Hunte, C. Crystal structure of the yeast cytochrome *bc*<sub>1</sub> complex with its bound substrate cytochrome c. *Proc. Natl. Acad. Sci. USA* **99**, 2800-2805, (2002).
- 5 Shimada, S. *et al.* Complex structure of cytochrome *c*–cytochrome c oxidase reveals a novel protein–protein interaction mode. *EMBO J.* **36**, 291-300, (2017).
- 6 Scharlau, M. *et al.* Definition of the Interaction Domain and Electron Transfer Route between Cytochrome c and Cytochrome Oxidase. *Biochemistry* **58**, 4125-4135, (2019).
- 7 Millett, F., Havens, J., Rajagukguk, S. & Durham, B. Design and use of photoactive ruthenium complexes to study electron transfer within cytochrome *bc*<sub>1</sub> and from cytochrome *bc*<sub>1</sub> to cytochrome c. *Biochim. Biophys. Acta* **1827**, 1309-1319, (2013).
- 8 Moe, A., Trani, J. D., Rubinstein, J. L. & Brzezinski, P. Cryo-EM structure and kinetics reveal electron transfer by 2D diffusion of cytochrome c in the yeast III-IV respiratory supercomplex. *Proc. Natl. Acad. Sci. USA* **118**, e2021157118, 2021157111-2021157119, (2021).
